# Supplementary material for: Cooperation between RUNX1-ETO9a and Novel Transcriptional Partner KLF6 in Upregulation of Alox5 in Acute Myeloid Leukemia
Source: PubMed Central journal article supplement (PMC3794898; doi:10.1371/journal.pgen.1003765), 2013-10-10
Supplement: pgen.1003765.s001.pdf [file pgen.1003765.s001.pdf]

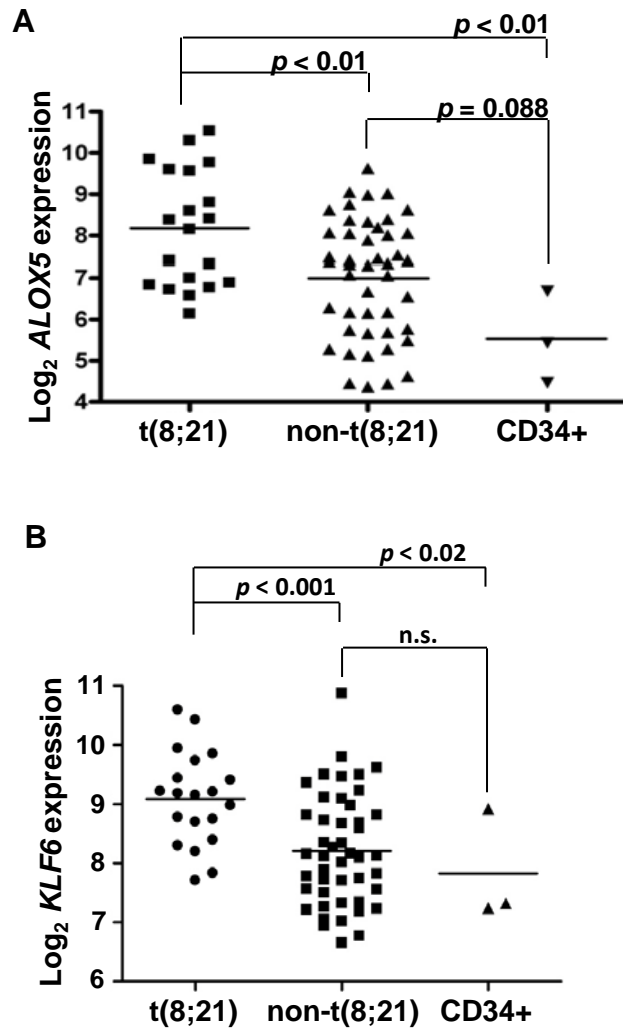

**Supporting Figure S1. ALOX5 and KLF6 expression in human AML patients.**

(A) Normalized log<sub>2</sub> expression of ALOX5 in human blast and mononuclear cells from bone marrow aspirates of AML subtype M2 patients with or without t(8;21) and in normal patient CD34+ samples. Patient data is from Valk *et al* [34]. Each point represents an individual patient sample. (B) Normalized log<sub>2</sub> expression of KLF6 in human AML subtype M2 patients as described in (A). n.s. = not significant. Patient samples were 80-100% blast cells at the time of analyses.
