# Supplementary material for: Cooperation between RUNX1-ETO9a and Novel Transcriptional Partner KLF6 in Upregulation of Alox5 in Acute Myeloid Leukemia
Source: PubMed Central journal article supplement (PMC3794898; doi:10.1371/journal.pgen.1003765), 2013-10-10
Supplement: pgen.1003765.s002.pdf [file pgen.1003765.s002.pdf]

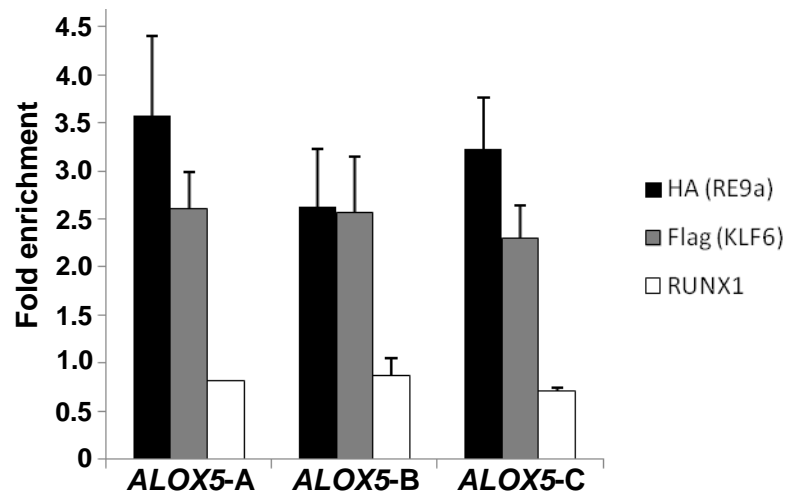

**Supporting Figure S2. RE9a and KLF6 bind the human *ALOX5* promoter**

Following ChIP, exogenous HA-RE9a and Flag-KLF6 show enrichment compared to IgG control at three locations within the *ALOX5* promoter. Endogenous RUNX1 shows no enrichment. Locations of three PCR amplicons relative to transcription start site of *ALOX5*: *ALOX5*-A -522 to -234, *ALOX5*-B -259 to -79, *ALOX5*-C +149 to +596.
