# Supplementary material for: Cooperation between RUNX1-ETO9a and Novel Transcriptional Partner KLF6 in Upregulation of Alox5 in Acute Myeloid Leukemia
Source: PubMed Central journal article supplement (PMC3794898; doi:10.1371/journal.pgen.1003765), 2013-10-10
Supplement: pgen.1003765.s003.pdf [file pgen.1003765.s003.pdf]

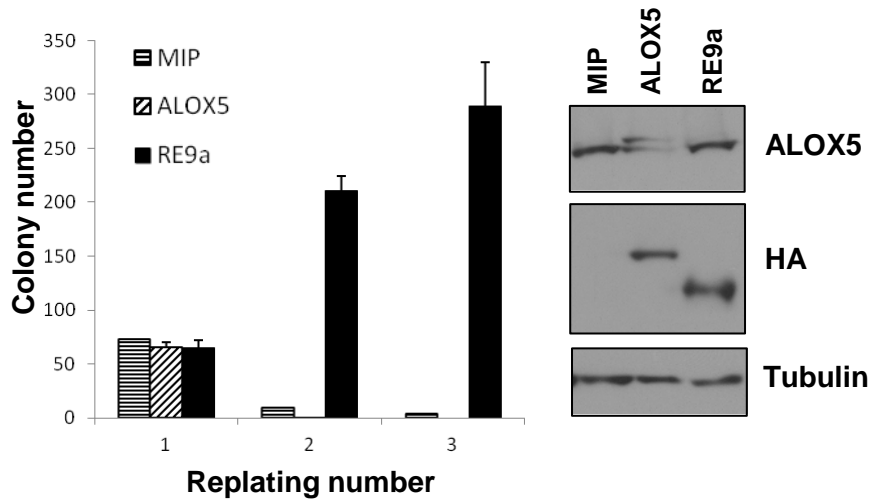

### Supporting Figure S3. *Alox5* in cellular self-renewal.

Exogenous ALOX5 is insufficient to increase cellular self-renewal on its own. Wildtype bone marrow cells were transduced with control (MIP), HA-ALOX5 or HA-RE9a retrovirus and serially replated in methylcellulose. Data shown are averages and standard deviations of a representative dataset. Three independent assays were performed. Expression of ALOX5 and RE9a in bone marrow cells after selection is shown by western blot (right). Tubulin serves as a loading control.
