# Supplementary material for: Cooperation between RUNX1-ETO9a and Novel Transcriptional Partner KLF6 in Upregulation of Alox5 in Acute Myeloid Leukemia
Source: PubMed Central journal article supplement (PMC3794898; doi:10.1371/journal.pgen.1003765), 2013-10-10
Supplement: pgen.1003765.s004.pdf [file pgen.1003765.s004.pdf]

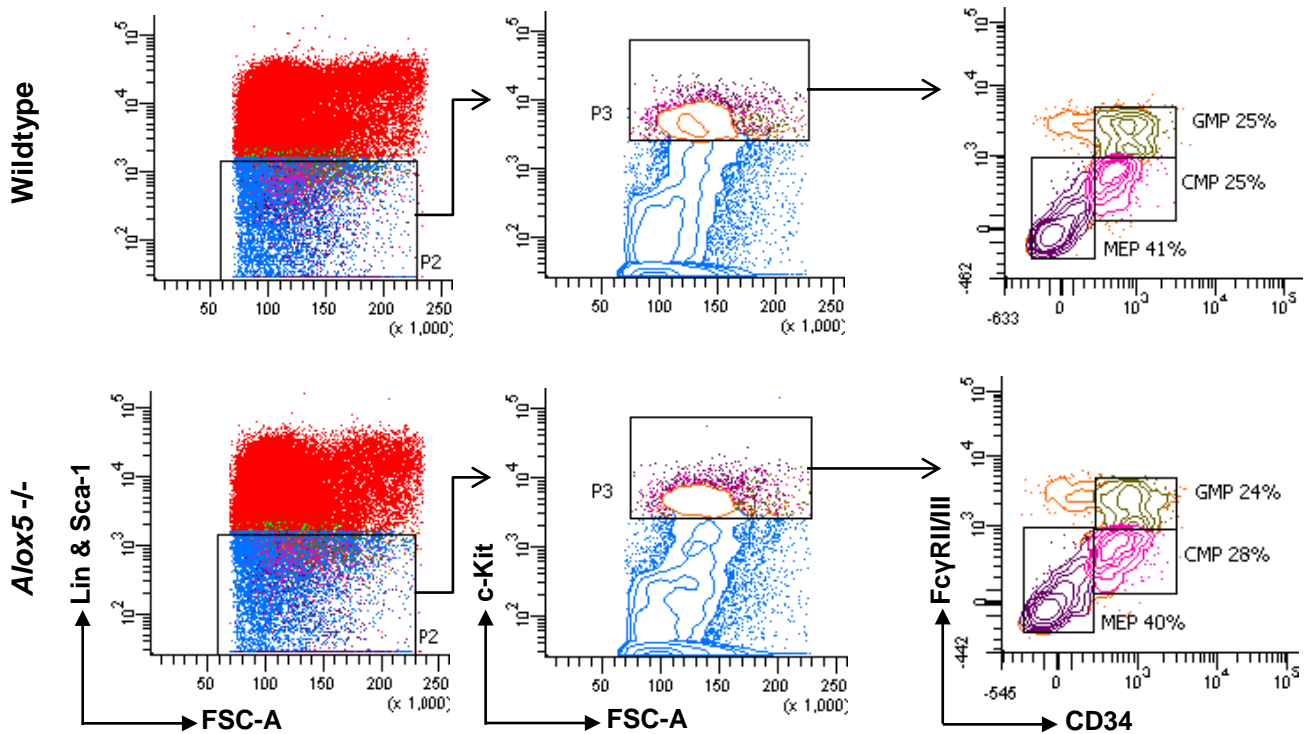

**Supporting Figure S4. Myeloid progenitor profiles in untreated wildtype and *Alox5*<sup>-/-</sup> mice.**

Distribution of Lin<sup>-</sup>Sca-1<sup>+</sup>c-Kit<sup>+</sup> bone marrow cells harvested from untreated mice shown based on expression of CD34 and Fcγ receptors II/III (FcγRII/III). Three mice analyzed per genotype, with representative distributions shown. GMP = Granulocyte/Monocyte Progenitor; CMP = Common Myeloid Progenitor; MEP = Megakaryocyte/Erythroid Progenitor.
